# Supplementary figures and images for: Mitochondrial Ca2+ and membrane potential, an alternative pathway for Interleukin 6 to regulate CD4 cell effector function
Source: eLife journal article supplement (doi:10.7554/elife.06376), 2015-05-14

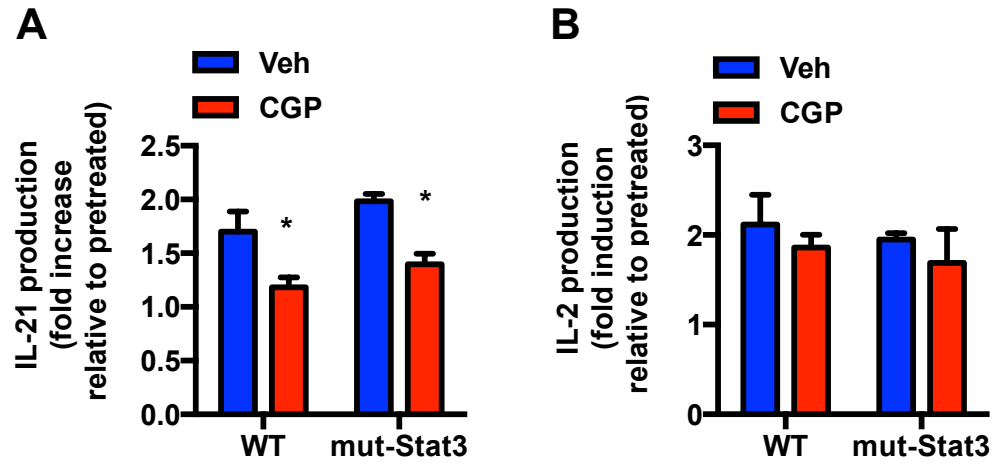

Figure 6-figure supplement 1.

Supplement: supp [file elife-06376-supp-v1.zip]

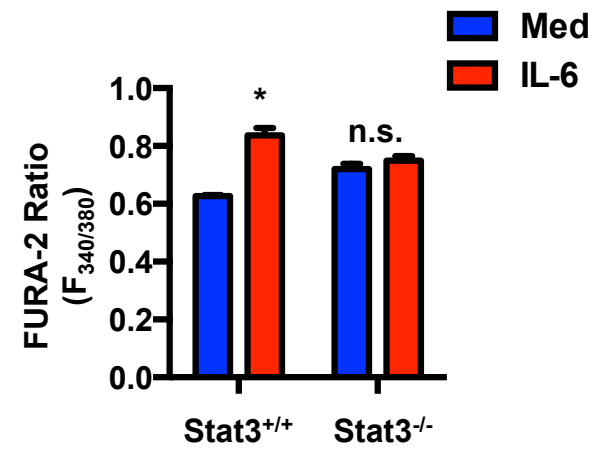

Figure 5-figure supplement 2.

Supplement: supp [file elife-06376-supp-v1.zip]

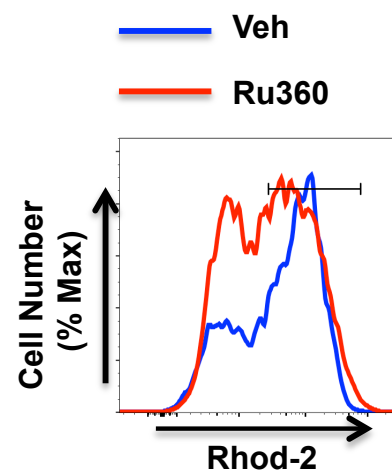

Figure 6-figure supplement 3.

Supplement: supp [file elife-06376-supp-v1.zip]

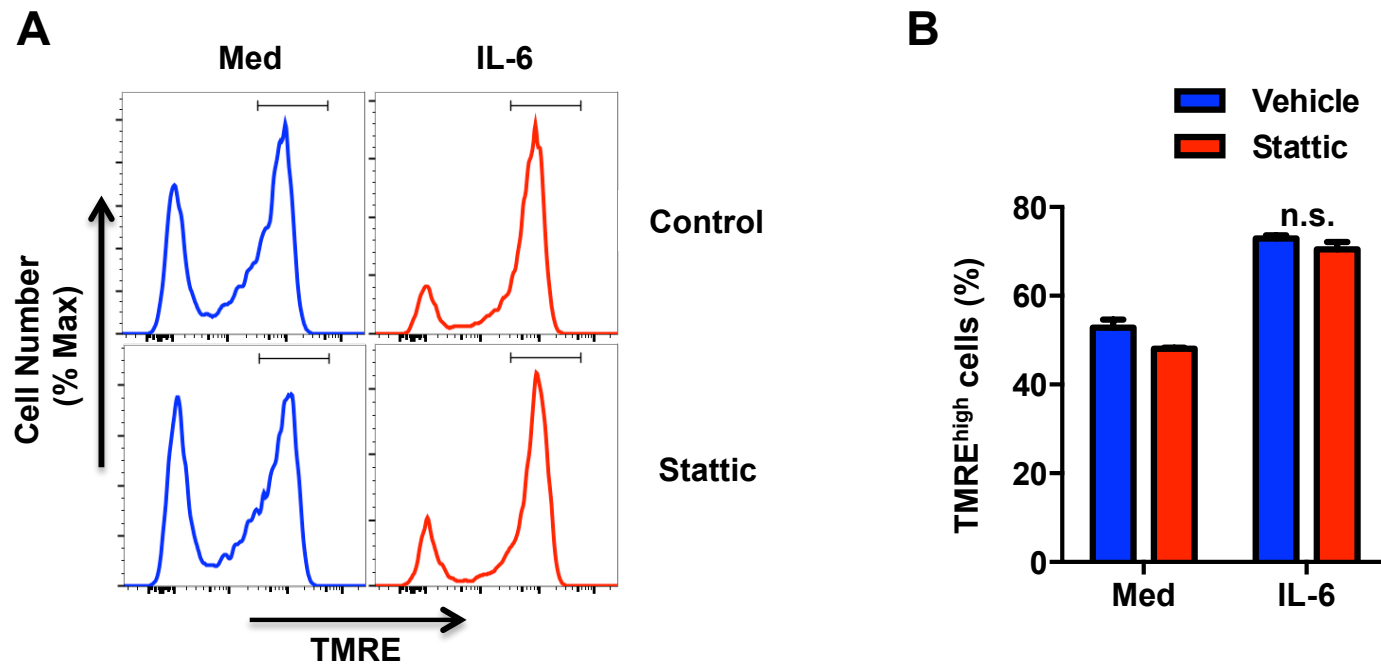

Figure 5-figure supplement 1.

Supplement: supp [file elife-06376-supp-v1.zip]

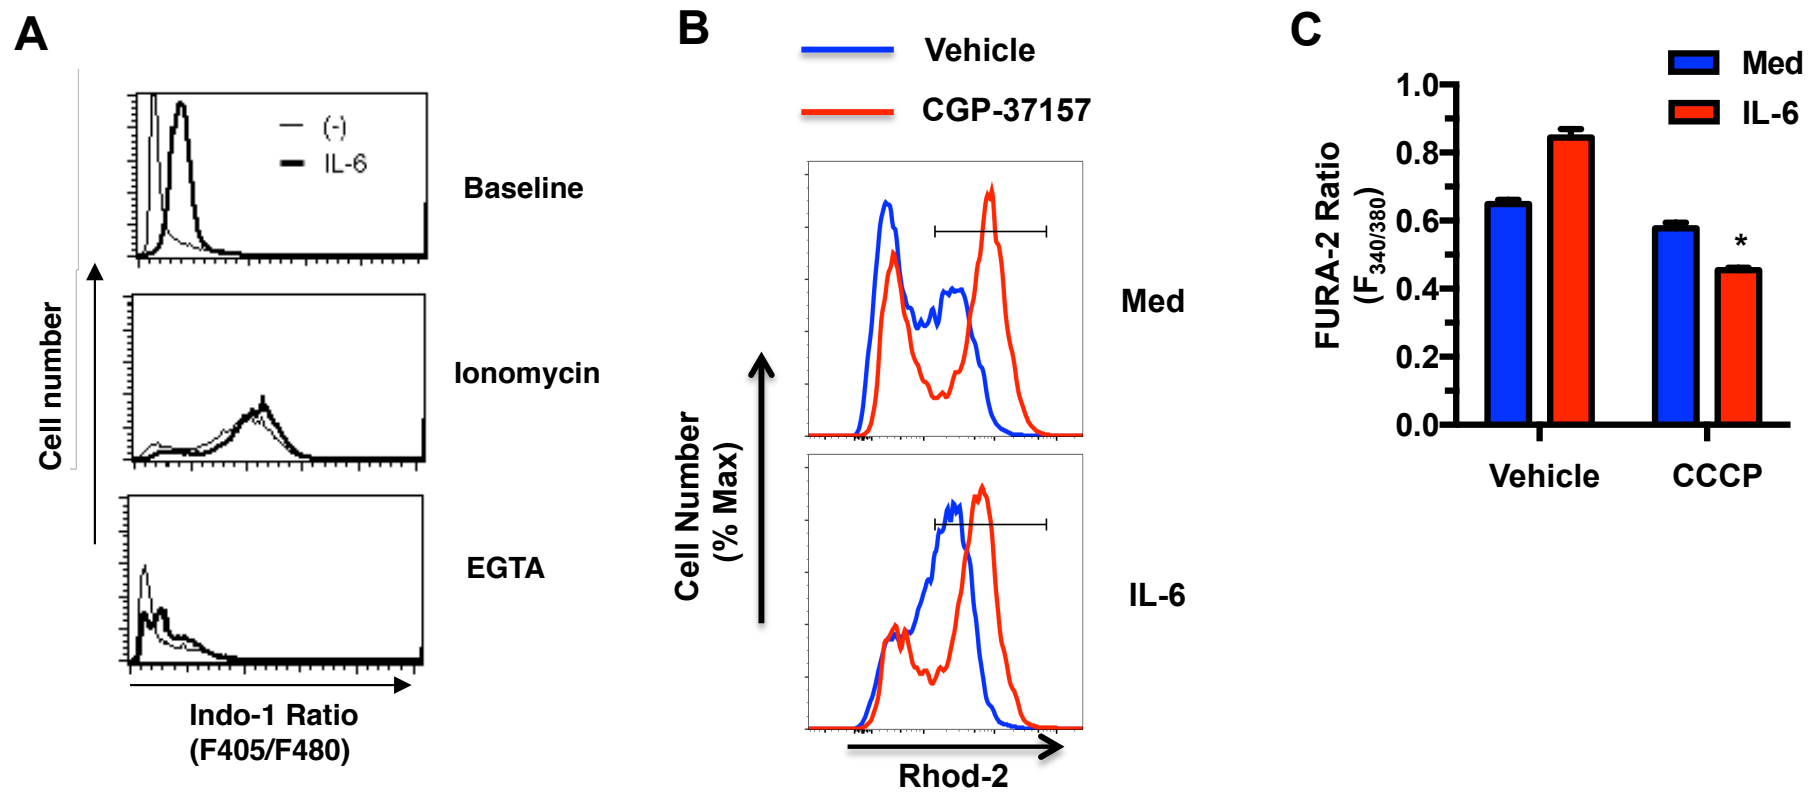

Figure 4-figure supplement 1.

Supplement: supp [file elife-06376-supp-v1.zip]

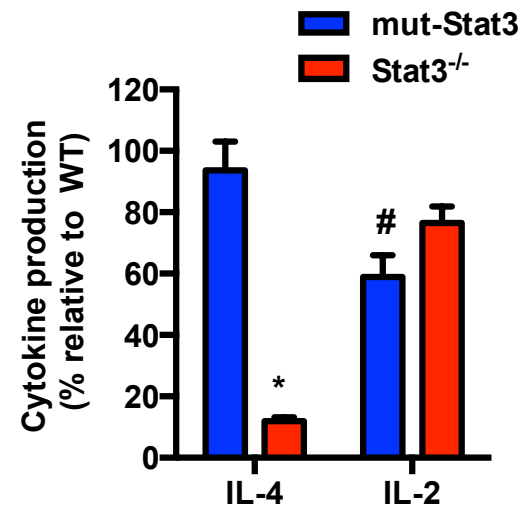

Figure 6-figure supplement 2.

Supplement: supp [file elife-06376-supp-v1.zip]
